# Supplementary material
Source: PubMed Central journal article supplement (PMC8221759)
Supplement: sj-pdf-1-jcb-10.1177_0271678X20973787.pdf [file sj-pdf-1-jcb-10.1177_0271678X20973787.pdf]

## Supplemental figure 1

**a**

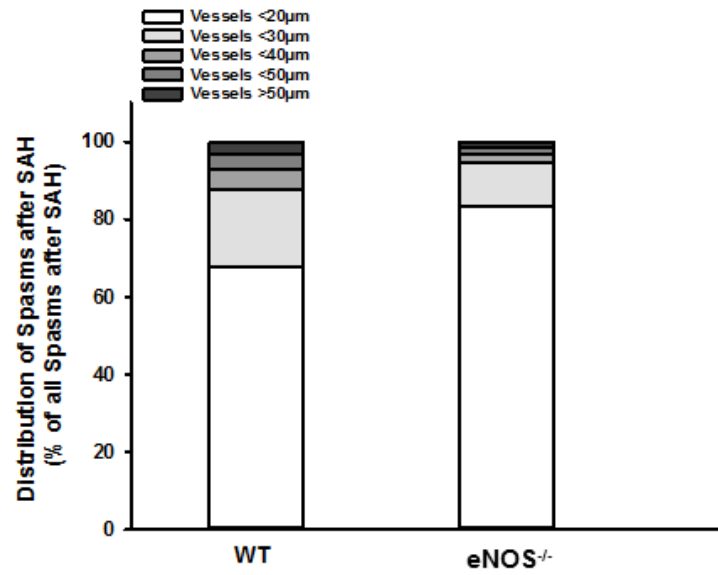

**b**

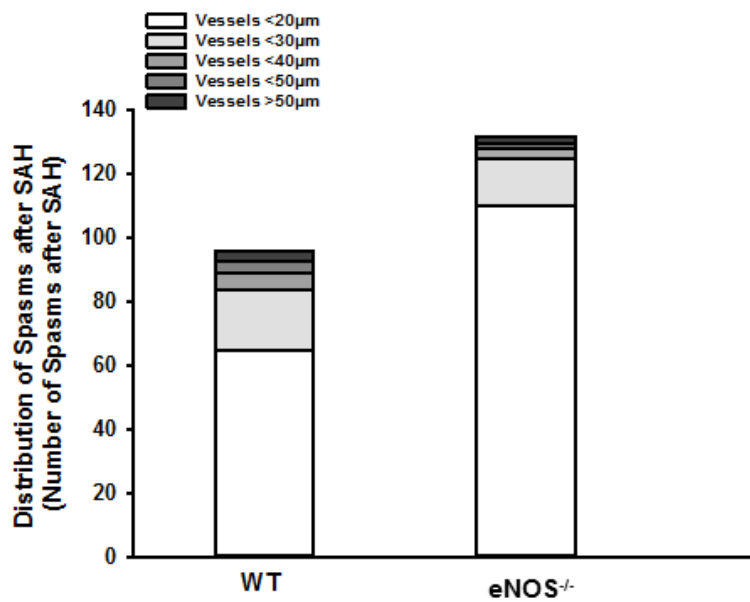

**Supplemental Figure 1. Distribution of microvascular spasms.** **a.** Percentage of spasms and **b.** number of spasms displayed per vessel diameter. Over 80% of MVS were detected in vessels with a diameter below 30 µm.
